# Supplementary material for: Revisiting the Link between House Prices and Monetary Policy
Source: publisher site journal article supplement (doi:10.1515/bejm-2021-0099), 2021-11-12

# Appendix to “Revisiting the Link between House Prices and Monetary Policy”

## 1 Variance Decomposition of Real House Price

Figure 1: Variance Decomposition of Real House Price: All Shocks

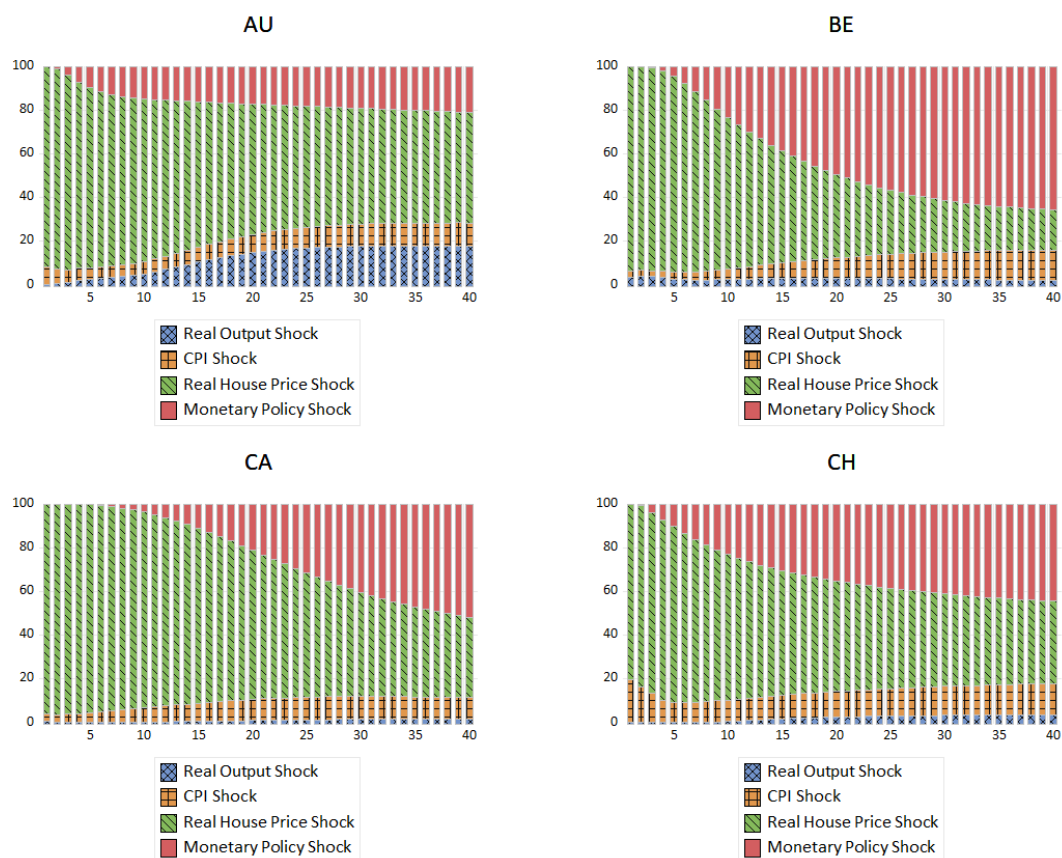

Figure 2: Variance Decomposition of Real House Price: All Shocks

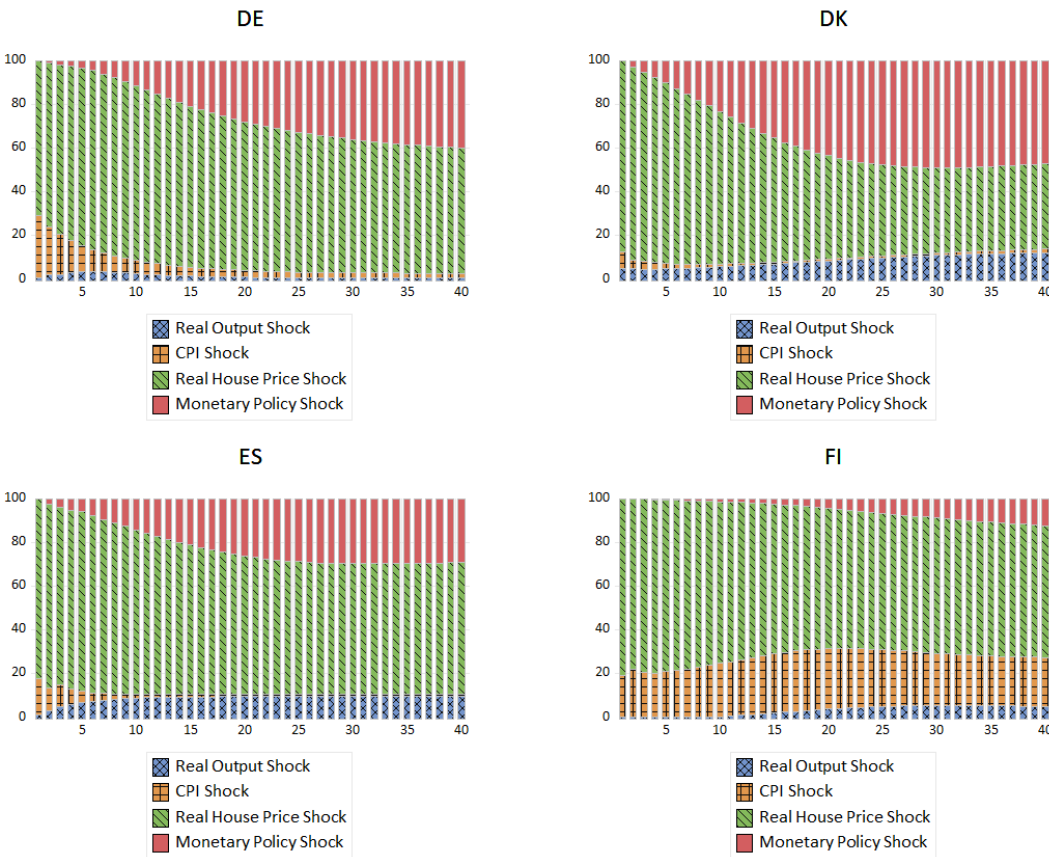

Figure 3: Variance Decomposition of Real House Price: All Shocks

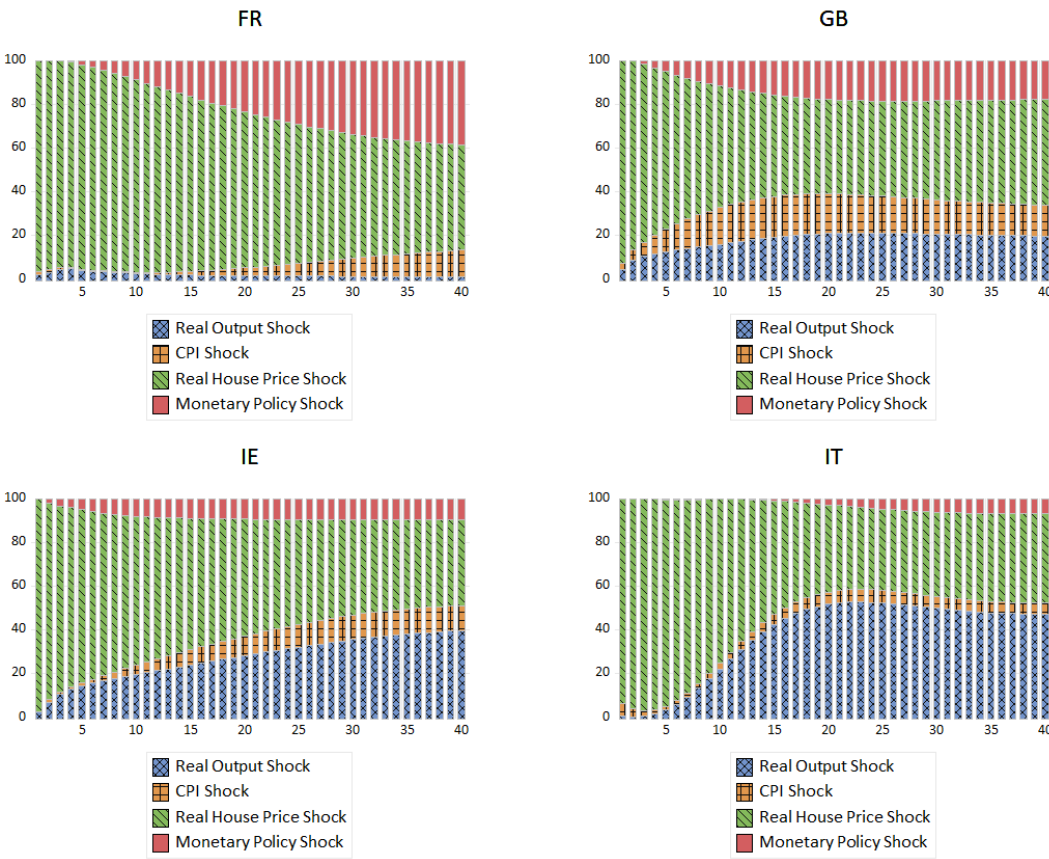

Figure 4: Variance Decomposition of Real House Price: All Shocks

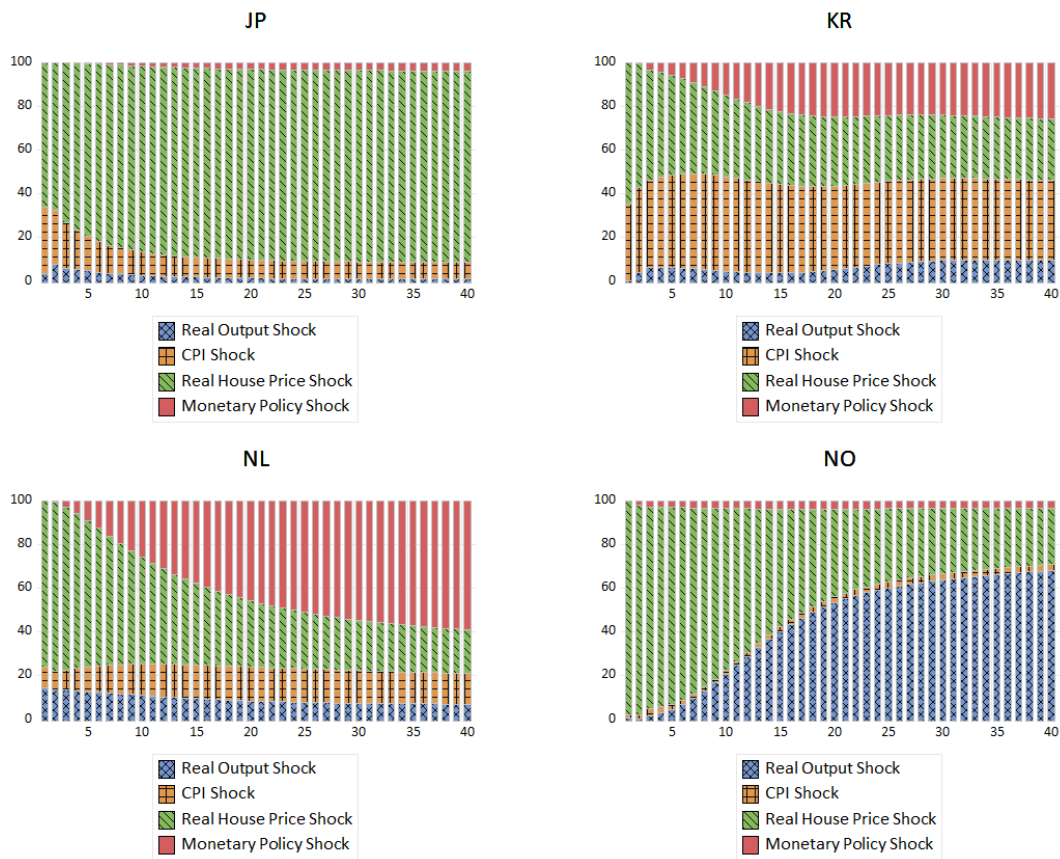

Figure 5: Variance Decomposition of Real House Price: All Shocks

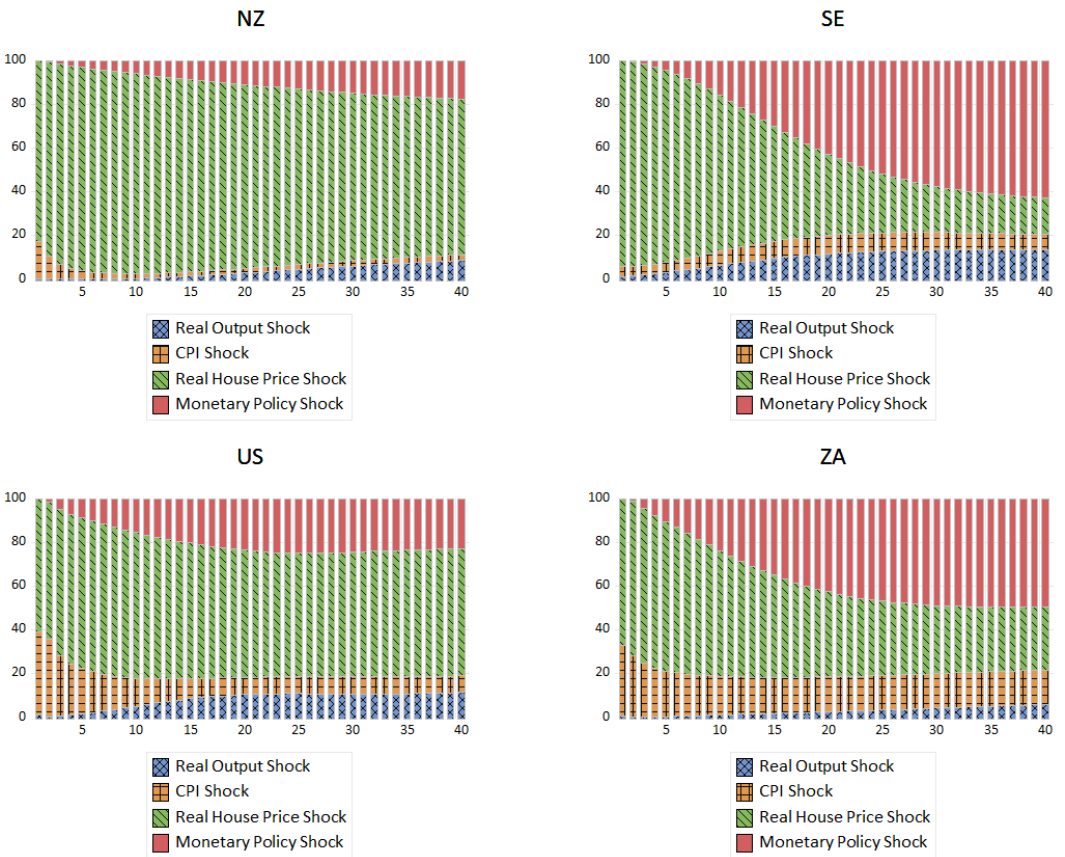

## 2 Variance Decomposition of Short-Run Interest Rate

Figure 6: Variance Decomposition of Short-Run Interest Rate: All Shocks

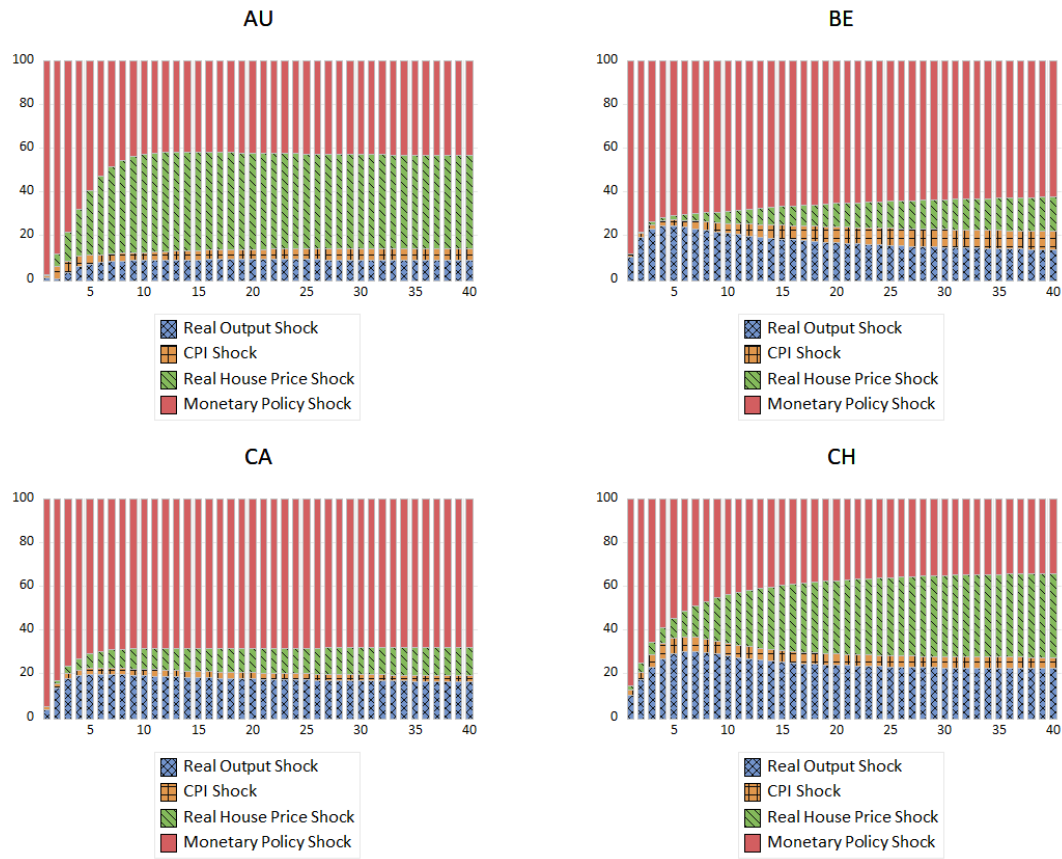

Figure 7: Variance Decomposition of Short-Run Interest Rate: All Shocks

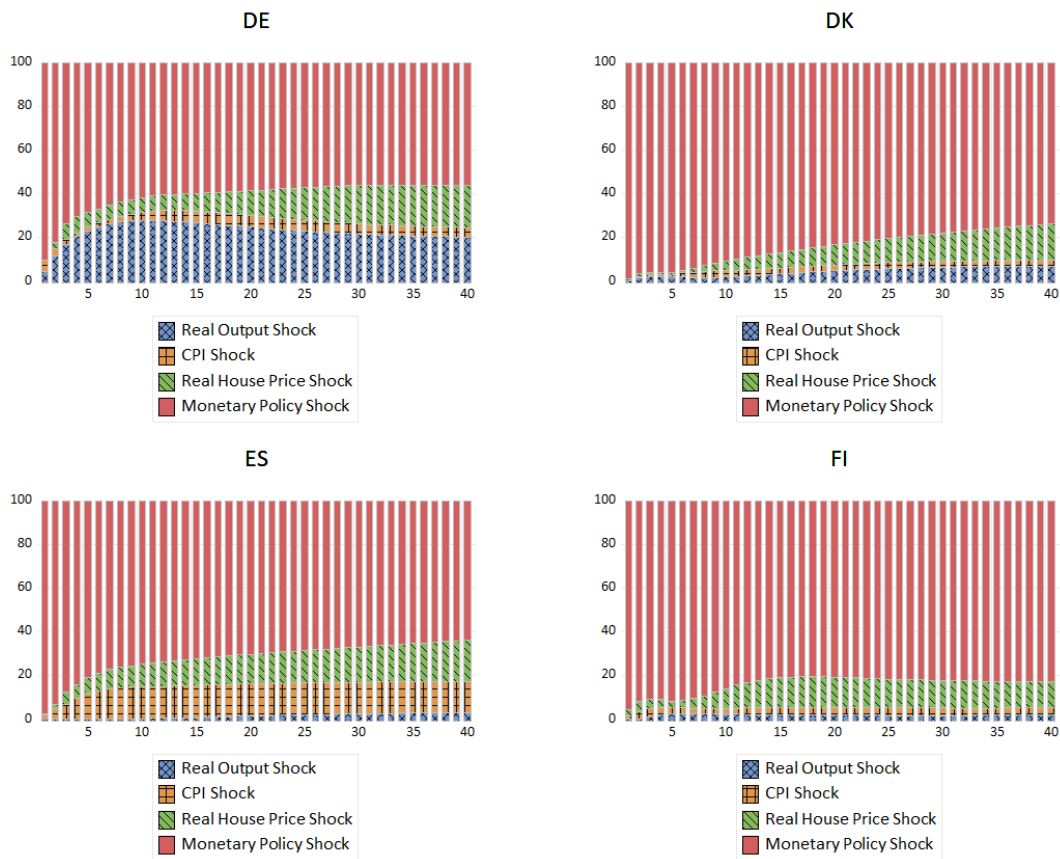

Figure 8: Variance Decomposition of Short-Run Interest Rate: All Shocks

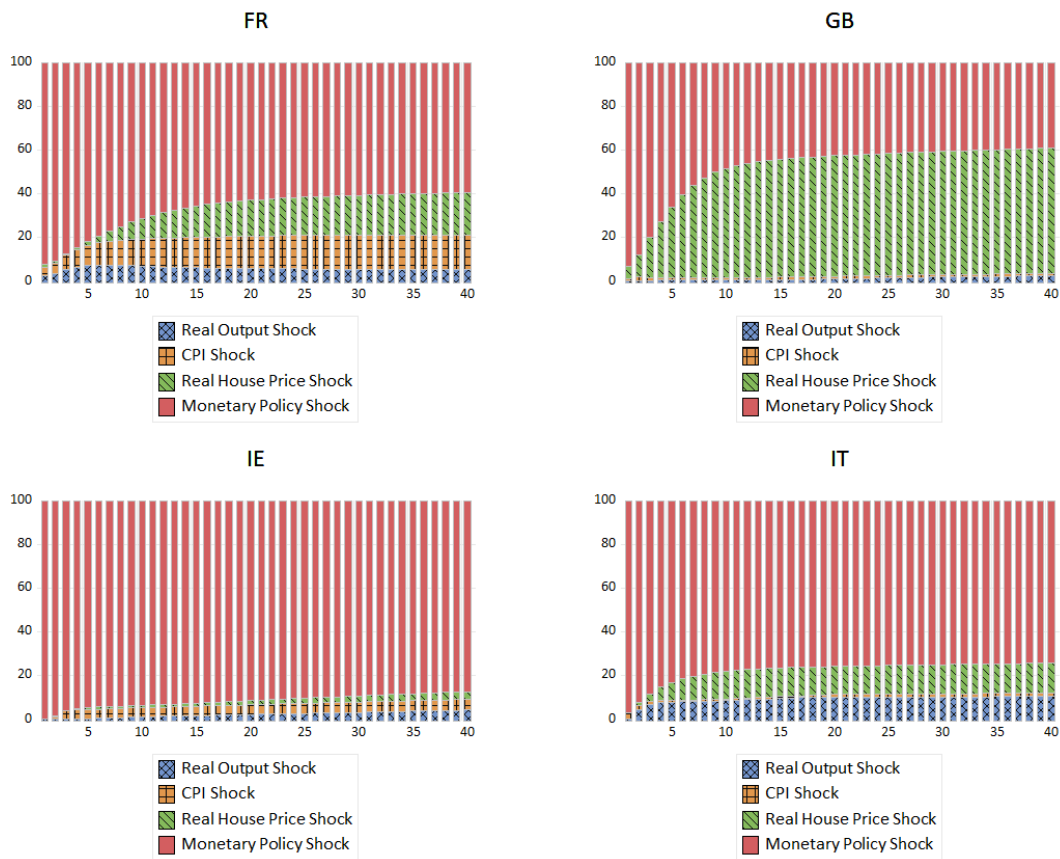



Figure 9: Variance Decomposition of Short-Run Interest Rate: All Shocks

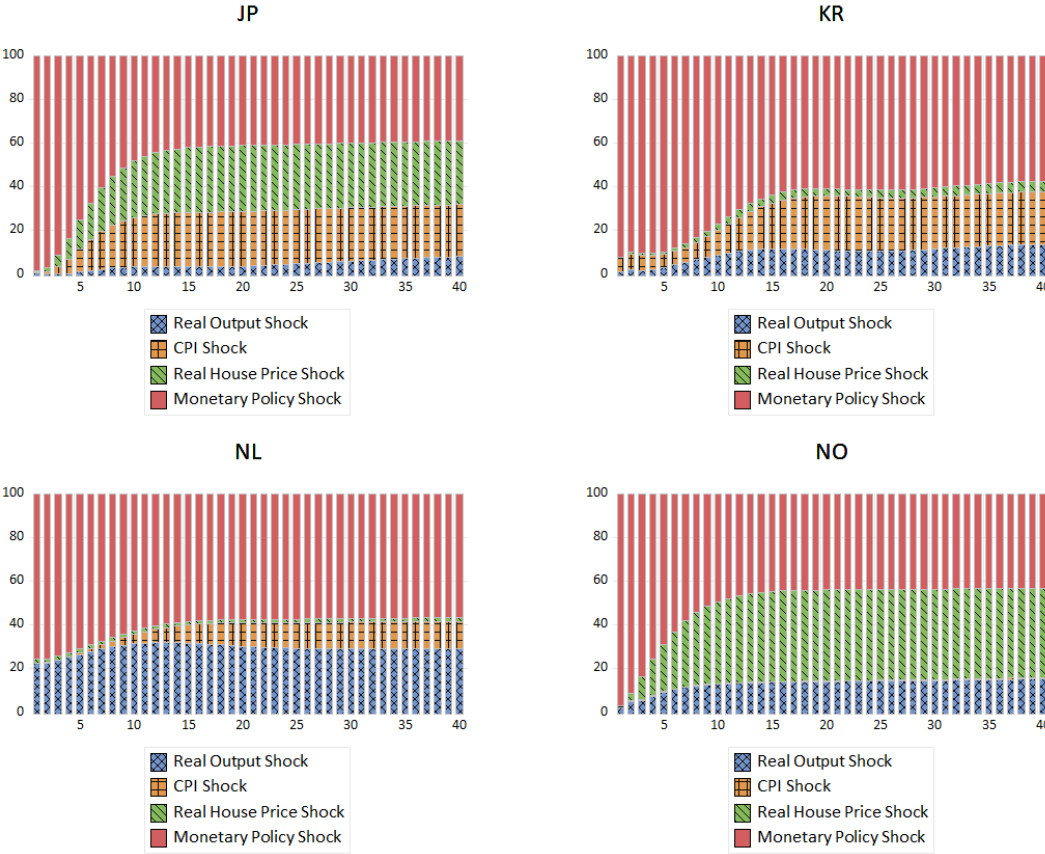

Figure 10: Variance Decomposition of Short-Run Interest Rate: All Shocks

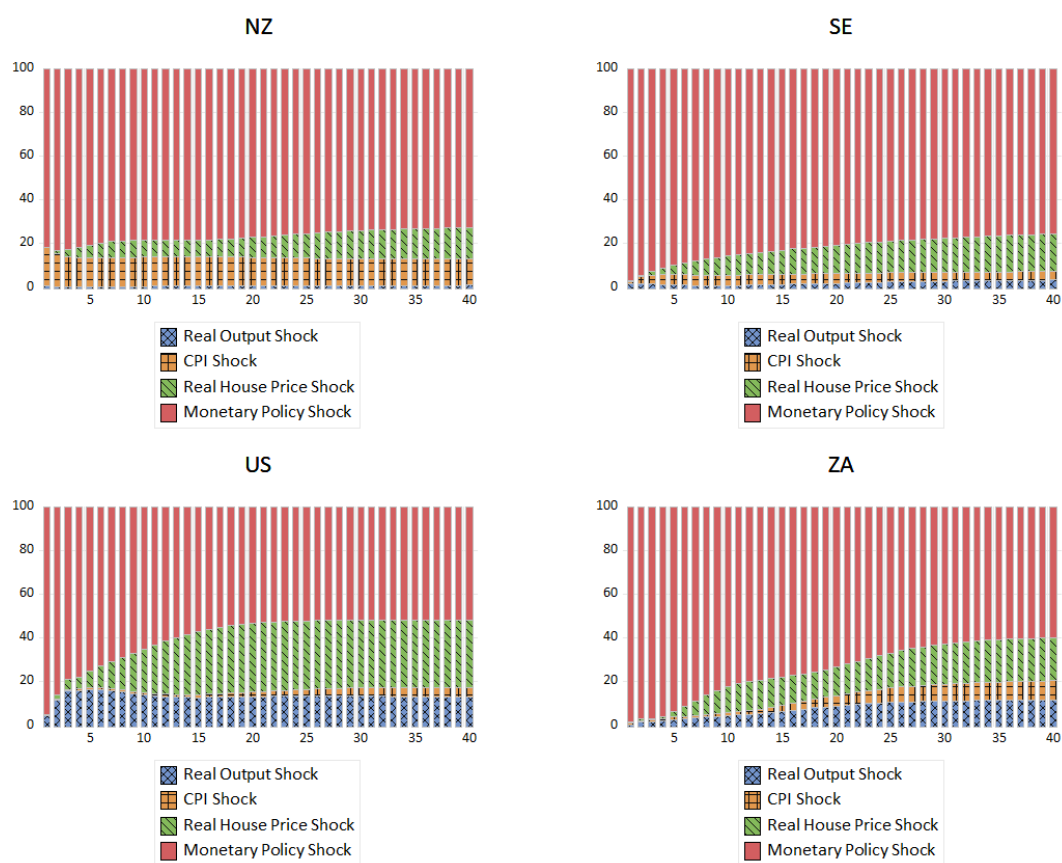

Supplement: Supplementary file 1 [file j_bejm-2021-0099_suppl.pdf]
